# Supplementary material for: In Situ Polymerization of Linseed Oil-Based Composite Film: Enhancement of Mechanical and Water Barrier Properties by the Incorporation of Cinnamaldehyde and Organoclay
Source: MDPI journal article supplement (doi:10.3390/molecules27228089), 2022-11-21
Supplement: s1 [file s1]

# In situ Polymerization of Linseed Oil-based Composite Film: Enhancement of Mechanical and Water Barrier Properties by the Incorporation of Cinnamaldehyde and Organoclay

Rim Guesmi <sup>1</sup>, Nasreddine Benbettaieb <sup>2,\*</sup>, Mohamed Ramzi Ben Romdhane <sup>3,4</sup>, Thouraya Barhoumi-Slimi <sup>1,4</sup> and Ali Assifaoui <sup>2,\*</sup>

<sup>1</sup> Department of Chemistry, Laboratory of Structural (Bio)Organic Chemistry and Polymers. Faculty of Sciences of Tunis, University of Tunis El Manar, Tunis, Tunisia;

<sup>2</sup> UMR PAM, University of Burgundy, Institut Agro, Dijon, France

<sup>3</sup> Laboratory of Composite Materials and Clay Minerals, National Center of Researches in Material Sciences (CNRSM), Hammam lif, Tunisia

<sup>4</sup> High Institute of Environmental Science and Technology, Technopark of Borj Cedria, University of Carthage, Hammam-lif, Tunisia

\* Correspondence: nasreddine.benbettaieb@u-bourgogne.fr (N.B.); ali.assifaoui@u-bourgogne.fr (A.A.)

## Figure S1: SEM images and elementary analysis

SEM images of clays at the surface of the composite film. The elementary analysis concerns the red square.

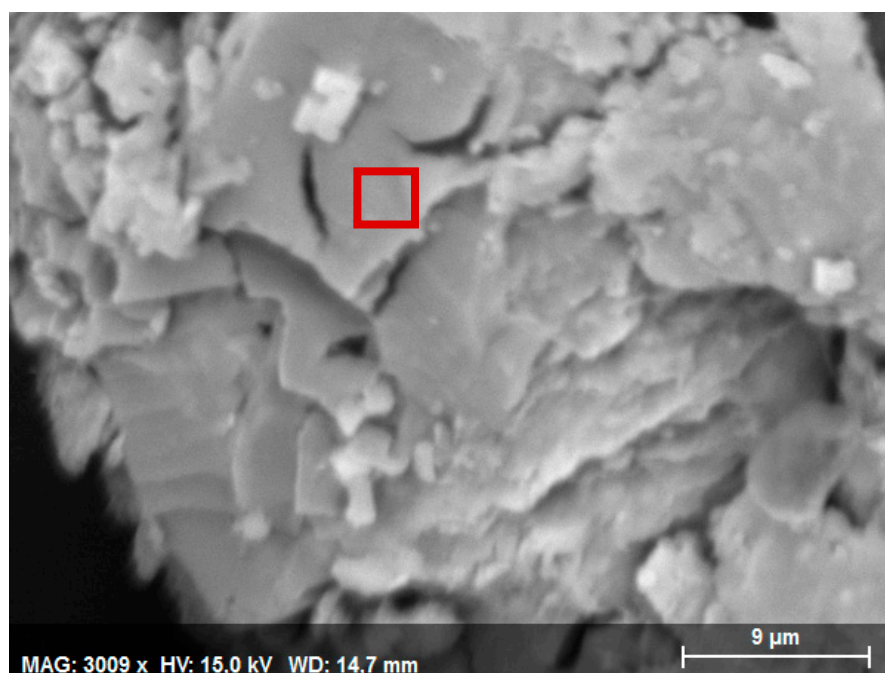

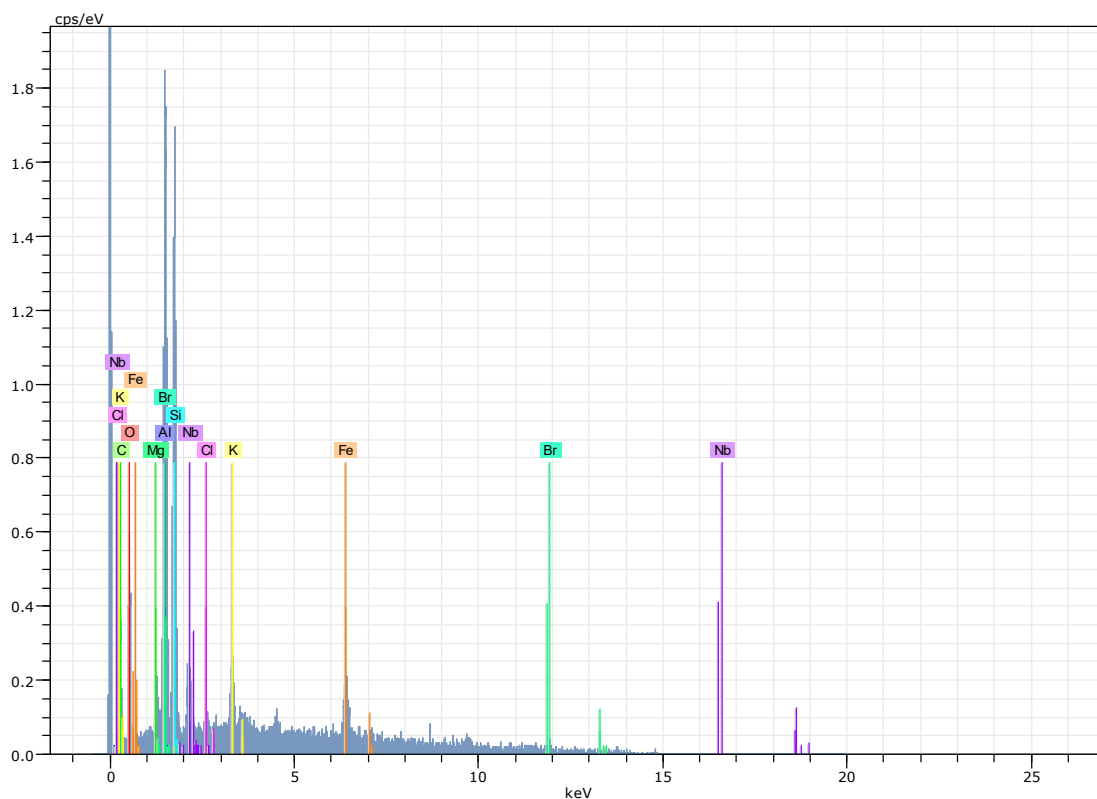

Spectrum: C50M5

| El        | AN        | Series          | unn. C<br>[wt.%] | norm. C<br>[wt.%] | Atom. C<br>[at.%] | Error (1 Sigma)<br>[wt.%] |
|-----------|-----------|-----------------|------------------|-------------------|-------------------|---------------------------|
| C         | 6         | K-series        | 17,63            | 20,08             | 41,82             | 5,00                      |
| O         | 8         | K-series        | 12,96            | 14,76             | 23,07             | 3,11                      |
| Mg        | 12        | K-series        | 0,61             | 0,70              | 0,72              | 0,10                      |
| <b>Al</b> | <b>13</b> | <b>K-series</b> | <b>2,32</b>      | <b>2,65</b>       | 2,45              | 0,19                      |
| <b>Si</b> | <b>14</b> | <b>K-series</b> | <b>17,30</b>     | 19,71             | 17,55             | 0,84                      |
| Cl        | 17        | K-series        | 0,36             | 0,41              | 0,29              | 0,07                      |
| <b>K</b>  | <b>19</b> | <b>K-series</b> | <b>2,00</b>      | <b>2,28</b>       | <b>1,46</b>       | <b>0,14</b>               |
| <b>Fe</b> | <b>26</b> | <b>K-series</b> | <b>3,37</b>      | <b>3,84</b>       | 1,72              | 0,21                      |
| <b>Br</b> | <b>35</b> | <b>L-series</b> | <b>26,66</b>     | <b>30,36</b>      | 9,51              | 1,40                      |
| Nb        | 41        | L-series        | 4,58             | 5,21              | 1,40              | 0,29                      |
| Total:    |           |                 | 87,80            | 100,00            | 100,00            |                           |

The elementary analysis showed the presence of Al, Si, Br, Fe which are the main element present in the modified clay. Such result indicates clearly the presence of the clay at the surface of the clay. The high amount of C is due mainly to the coating which was made to increase the resolution of the images

**Figure S2: GC-MS of the linseed oil**

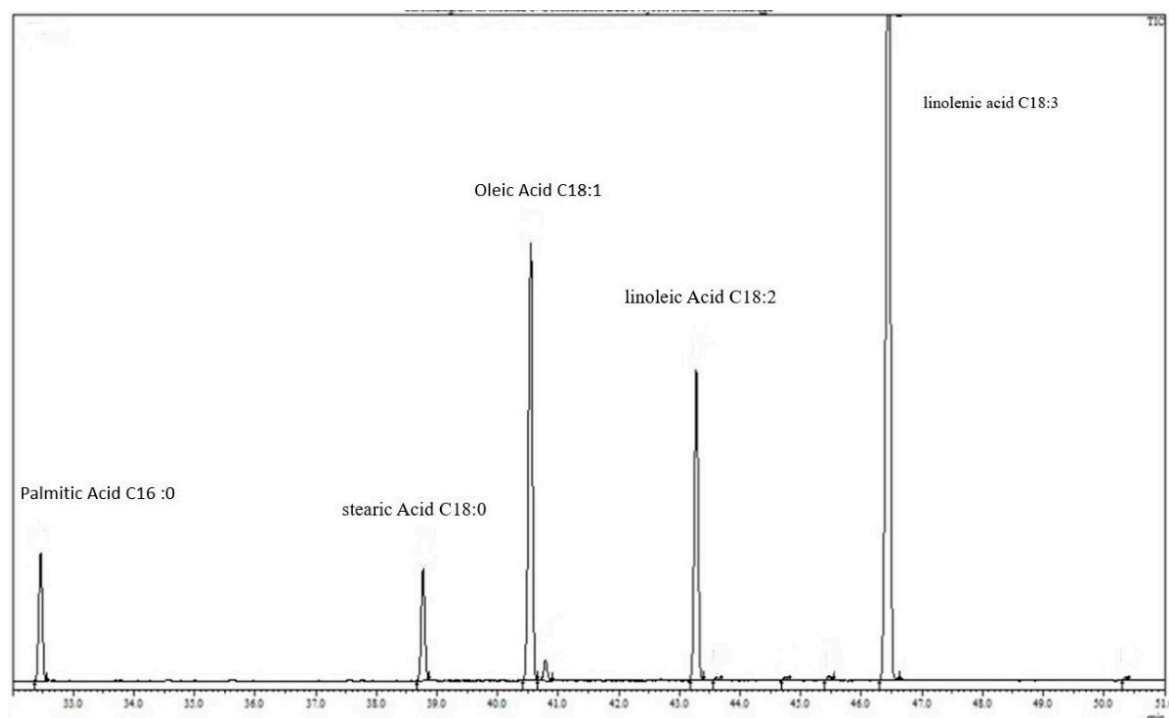

| Carbon length          | Fatty Acids    | FA composition (%) |
|------------------------|----------------|--------------------|
| Saturated FAs          |                |                    |
| C16:0                  | Palmitic Acid  | 5.87               |
| C18:0                  | Stéaric Acid   | 5.15               |
| C20:0                  | Arachidic Acid | 0.12               |
| C22:0                  | Béhénic Acid   | 0.1                |
| $\Sigma$ saturated FAs |                | 11.24              |
| Monounsaturated FAs    |                |                    |
| C18:1 $\Delta$ 9c      | Oleic Acid     | 22.04              |
| C18:1 $\Delta$ 11c     | Vaccenic Acid  | 0.98               |

|                               |                                    |       |
|-------------------------------|------------------------------------|-------|
| $\Sigma$ mono_unsaturated FAs |                                    | 23.02 |
| Polyunsaturated FAs           |                                    |       |
| C18:2 $\Delta$ 9.12           | linoleic Acid $\omega$ 6           | 14.90 |
| C18:2 $\Delta$ 11.14          | 11.14 octadecadienoic Acid         | 0.10  |
| C20:3 $\Delta$ 11. 14.17      | Eicosatrienoic                     | 0.20  |
| C18:3 $\Delta$ 9.12.15        | $\alpha$ linolenic Acid $\omega$ 3 | 50.46 |
| $\Sigma$ Poly-unsaturated FAs |                                    | 65.66 |
| Unsaturated /saturated        |                                    | 7.88  |
| $\omega$ 3/ $\omega$ 6        |                                    | 3.38  |
